# Supplementary material for: Metabonomic strategy for the detection of metabolic effects of probiotics combined with prebiotic supplementation in weaned rats
Source: PubMed Central journal article supplement — RSC Adv. 2018 Jan 30;8(9):5042–57. doi: 10.1039/c7ra12067b (PMC9078034; doi:10.1039/c7ra12067b), 2018-01-30
Supplement: RA-008-C7RA12067B-s001.pdf [file RA-008-C7RA12067B-s001.pdf]

### Supplementary information

**Supplementary Table S1** NMR data for metabolites detected in urine extracts

| Key | Metabolites                  | $\delta$ 1 H (ppm)                                                                                 | $\delta$ 13 C (ppm <sup>a</sup> ) |
|-----|------------------------------|----------------------------------------------------------------------------------------------------|-----------------------------------|
| 1   | 2-Hydroxy-3-methylvalerate   | 0.86(t)0.93(d)1.14(m)1.35(m)1.74(m)3.87(d)                                                         | —                                 |
| 2   | Pantothenic acid             | 0.84(s)                                                                                            | 21.8                              |
| 3   | Isovalerate                  | 0.895(d), 1.929(m), 2.049(d)                                                                       | 24.44, 29.27, 49.26               |
| 4   | 2-Hydroxybutyrate            | 0.899(m), 1.689(m), 3.996(dd)                                                                      | 10.68, 29.48, 76.07               |
| 5   | 3-Methylglutarate            | 0.914(d),1.976(d),1.977(q),2.195(m),2.215(s),2.215(t)                                              | —                                 |
| 6   | Isovalerylglycine            | 0.925(d), 1.994(m), 2.166(d), 3.746(d)                                                             | 24.37, 30.2, 46.93, —             |
| 7   | Isoleucine                   | 0.936(t), 0.995(d), 1.249(m), 1.452(m), 1.971(m), 3.655(d)                                         | 14.7, 17.2, 26.8, 26.8, 62.4      |
| 8   | Leucine                      | 0.925(d), 0.936(s), 1.703(m), 3.725(d)                                                             | 23.39, 24.3, 26.62, 56.88         |
| 9   | Ketoleucine                  | 0.944(d), 2.100(m), 2.617(d)                                                                       | 24.32, 26.2, —                    |
| 10  | Isobutyrate                  | 1.053(d), 2.382(m)                                                                                 | 22.04, 39.32                      |
| 11  | Isopropanol                  | 1.146(d), 4.028(m)                                                                                 | 26.12, —                          |
| 12  | Ethanol                      | 1.185(t), 3.656(q)                                                                                 | 19.54, —                          |
| 13  | 3-Hydroxyisovalerate         | 1.275(s), 2.357(s)                                                                                 | 30.2,51.6                         |
| 14  | Threonine                    | 1.330(d), 3.579(d), 4.269(m)                                                                       | 23.5, 63.2, 68.2                  |
| 15  | Lactate                      | 1.331(d),4.115(q)                                                                                  | 22.89, 71.40                      |
| 16  | N-Acetyllysine               | 1.362(m),1.415(m),1.527(m),1.544(m),1.833(m),1.880(m),1.972(s),3.165(t),3.174(t),3.726(t),7.953(s) | —                                 |
| 17  | Lysine                       | 1.415(m), 1.719(m), 1.869(m), 3.018(t), 3.741(t)                                                   | 23.44, 29.72, —, 41.5, 57.58      |
| 18  | Alanine                      | 1.489(d), 3.780(q)                                                                                 | 18.26, 53.32                      |
| 19  | Citrulline                   | 1.558(m), 1.865(m), 3.124(dd), 3.743(t)                                                            | —, —, 42, 57.9                    |
| 20  | Ornithine                    | 1.775(m), 1.828(m), 1.929(m), 3.044(t), 3.782(d)                                                   | 25.5, 25.5, —, 41.12, 56.81       |
| 21  | N-Acetyltyrosine             | 1.919(s),2.832(m),3.086(d),4.369(m),6.836(d),7.137(d),7.723(s)                                     | —                                 |
| 22  | Acetate                      | 1.927(s)                                                                                           | 26.54                             |
| 23  | N-Acetylcarnitine            | 2.008(s),2.489(m),2.680(d),4.381(m),7.908(s)                                                       | —                                 |
| 24  | Proline                      | 2.023(m), 2.334(m), 3.320(m), 3.392(m), 4.147(t)                                                   | 25.78, 32.11, 48.71, 48.71, 63.51 |
| 25  | N-Acetylglycine              | 2.044(s), 3.763(d)                                                                                 | 24.2, 46.1                        |
| 26  | Glutamate                    | 2.056(m), 2.334(m), 3.741(m,m,q)                                                                   | 30.1, 36.4, 57.6                  |
| 27  | Glutamine                    | 2.138(m), 2.445(m), 3.768(t)                                                                       | 29.53, 32.96, 57.10               |
| 28  | O-Acetylcholine              | 2.143(s), 3.202(s), 3.711(t), 4.529(m)                                                             | 23.4, 56.8, 67.1, 60.2            |
| 29  | <i>p</i> -Cresol             | 2.253(s), 6.817(d), 7.130(d)                                                                       | 22.1, 117.9                       |
| 30  | Levulinate                   | 2.211(s), 2.384(t), 2.780(t)                                                                       | 32.42, 34.68, 41.12               |
| 31  | Acetone                      | 2.229(s)                                                                                           | 28.2                              |
| 32  | Acetoacetate                 | 2.266(s), 3.434(s)                                                                                 | 32.3                              |
| 33  | <i>p</i> -Cresol glucuronide | 2.299(s), 7.055(m), 7.237(m)                                                                       | 22.17, 123.16, 135.68             |
| 34  | <i>p</i> -Cresol sulfate     | 2.347(s), 7.217(d), 7.293(d)                                                                       | —, 121.61, 136.05                 |
| 35  | Pyruvate                     | 2.373(s)                                                                                           | 29.5                              |
| 36  | Succinate                    | 2.413(s)                                                                                           | 37.3                              |
| 37  | 4-Pyridoxine                 | 2.429(s), 7.834(s)                                                                                 | 20.39, 138.78                     |
| 38  | 2-Oxoglutarate               | 2.429(t), 2.995(t)                                                                                 | 33.2, 39.0                        |
| 39  | 5-Aminolevulinate            | 1.62(m),1.65(m),2.24(t),3.02(t)                                                                    | 38.9, 41.0                        |

|    |                                                                 |                                                                                                  |                                                      |
|----|-----------------------------------------------------------------|--------------------------------------------------------------------------------------------------|------------------------------------------------------|
| 40 | β-Alanine                                                       | 2.540(t), 3.196(t)                                                                               | 36.4, 39.97                                          |
| 41 | Citrate                                                         | 2.552(d), 2.658(d)                                                                               | 48.7, 48.7                                           |
| 42 | Methylamine                                                     | 2.613 (s)                                                                                        | 27                                                   |
| 43 | Dimethylamine                                                   | 2.719(s)                                                                                         | 36.8                                                 |
| 44 | Sarcosine                                                       | 2.729(s),3.602(s)                                                                                | —                                                    |
| 45 | Methylguanidine                                                 | 2.828(s), 3.356(s)                                                                               | 29.47, —                                             |
| 46 | Asparagine                                                      | 2.862(dd), 2.962(m), 3.995(dd)                                                                   | 37.6, 37.6, 54.3                                     |
| 47 | Trimethylamine                                                  | 2.887(s)                                                                                         | 47.4                                                 |
| 48 | N-Methylhydantoin                                               | 2.917(s),4.0782(s)                                                                               | —                                                    |
| 49 | N,N-Dimethylglycine                                             | 2.925(s), 3.712(s)                                                                               | 46.1, 62.2                                           |
| 50 | Creatine                                                        | 3.028(s), 3.926(s)                                                                               | 40.15, 56.25                                         |
| 51 | Creatine phosphate                                              | 3.030(s),3.993(s)                                                                                | —                                                    |
| 52 | Creatinine                                                      | 3.043(s), 4.052(s)                                                                               | 33.5, 58.39                                          |
| 53 | τ-Methylhistidine                                               | 3.065(m), 3.681,3.951(m), 7.001(s), 7.677(s)                                                     | 30.7, 36.5, 58.13, 122.92, —                         |
| 54 | N <sub>6</sub> ,N <sub>6</sub> ,N <sub>6</sub> -trimethyllysine | 3.109(s)                                                                                         | 47.14                                                |
| 55 | Malonate                                                        | 3.119(s)                                                                                         | —                                                    |
| 56 | Cis-aconitate                                                   | 3.123(s), 5.711(t)                                                                               | 46.7, 127                                            |
| 57 | Dimethyl sulfone                                                | 3.145(s)                                                                                         | —                                                    |
| 58 | Histidine                                                       | 3.144(dd), 3.249(dd), 4.001(q), 7.093(s), 7.844(s)                                               | —, —, —, 119, 139.1                                  |
| 59 | N-Nitrosodimethylamine                                          | 3.162(s), 3.802(s)                                                                               | 32.16, 39.86                                         |
| 60 | Phenylalanine                                                   | 3.117(dd), 3.270(dd), 4.001(q), 7.323(d), 7.365(t), 7.42(m)                                      | 38.9, 38.9, 58.9, 132.2, 129.8, 131.9                |
| 61 | Choline                                                         | 3.191(s), 3.504(t), 4.085(m)                                                                     | 56.9, 70.1, 58.2                                     |
| 62 | Phosphorylcholine                                               | 3.203(s), 3.671(t), 4.190(dd)                                                                    | 56.0, 68.56, 60.33                                   |
| 63 | Taurine                                                         | 3.243(t), 3.435(t)                                                                               | 49.5, 37.5                                           |
| 64 | β-Glucose                                                       | 3.243(t), 3.478(m), 3.492(m), 3.864(m), 3.927(s), 4.660(d)                                       | —, —, —, 63.26, 63.26, 98.39                         |
| 65 | Trimethylamine-N-oxide                                          | 3.266(s)                                                                                         | 61.5                                                 |
| 66 | Betaine                                                         | 3.273(s), 3.927(s)                                                                               | 57, 68                                               |
| 67 | Lactose                                                         | 3.276(t),3.507(m),3.604(m),3.710(m),3.768(m),3.847(m),<br>3.936(m), 4.455(d), 4.660(d), 5.211(d) | 76.16, —, —, —, 64.68, 63.52, —, 104.59, 98.91, 93.9 |
| 68 | trans-Aconitate                                                 | 3.435(s), 6.571(s)                                                                               | 39.2, 133.4                                          |
| 69 | 4-Hydroxyphenylacetate                                          | 3.437(s),6.850(d),7.154(d)                                                                       | —                                                    |
| 70 | p-Hydroxyphenylacetate                                          | 3.445(s), 6.865(d), 7.169(d)                                                                     | 46.5, 118.59, 133.69                                 |
| 71 | Homogentisate                                                   | 3.463(s),6.691(dd),6.700(s),6.793(d)                                                             | —                                                    |
| 72 | Glycerol                                                        | 3.551(t), 3.634(m), 3.767(m)                                                                     | 65.2, 65.2, 74.7                                     |
| 73 | 2-Hydroxyphenylacelate                                          | 3,52(s)6.90(d)6.93(d)7.17(d)7.20(t)                                                              | 47.04, 119.45, 124.19, 132.91                        |
| 74 | Ethylene glycol                                                 | 3.662(s)                                                                                         | —                                                    |
| 75 | Glycogen                                                        | 3.633(m), 3.657(m), 3.829,3.874,3.975,5.394(s)                                                   | 72.59, 79.59,72.56,63.26,101.78                      |
| 76 | N-Phenylacetyl glycine                                          | 3.665(s),3.744(d),7.344(d),7.349(t),7.410(t),7.977(s)                                            | —                                                    |
| 77 | Mannitol                                                        | 3.677(dd), 3.770(m), 3.805(d), 3.873(dd)                                                         | 65.37, 72.8, 72.66, 66.69                            |
| 78 | Phenylacetyl glycine                                            | 3.680(s), 3.746(d), 7.365(t), 7.425(t)                                                           | 44.42, —, 131.12, 130.89                             |
| 79 | Indole-3-acetate                                                | 3.681(s), 7.161(t), 7.216(t), 7.507(d), 7.635(d)                                                 | 36.65,121.26,126.49,114.38, 121.37                   |
| 80 | Guanidoacetate                                                  | 3.801(s)                                                                                         | 47.5                                                 |

|    |                           |                                                  |                           |
|----|---------------------------|--------------------------------------------------|---------------------------|
| 81 | Glycolate                 | 3.932(s)                                         | 64.19                     |
| 82 | Hippurate                 | 3.975(d), 7.553(t), 7.642(t), 7.837(d), 8.508(s) | 46.1, 131.5, 134.9, 129.9 |
| 83 | 4-Hydroxyhippurate        | 3.978(s), 6.976(d), 7.765(d)                     | —                         |
| 84 | Tartrate                  | 4.329(s)                                         | 77.38                     |
| 85 | Trigonelline              | 4.438(s), 8.084(t), 8.837(t), 9.122(s)           | 51.3, 130.8, —, —         |
| 86 | 1-Methylnicotinamide      | 4.476(s), 8.181(t), 8.894(d), 8.960(d), 9.272(s) | 50.85, 131.14, —, —, —    |
| 87 | Allantion                 | 5.39(s)                                          | —                         |
| 88 | Fumarate                  | 6.524(s)                                         | 137.5                     |
| 89 | <i>p</i> -Hydroxybenzoate | 6,970(m), 7.759(m)                               | 117.2, 133.68             |
| 90 | Benzoate                  | 7.474(t),7.546(t),7.863(d)                       | —                         |
| 91 | Xanthine                  | 7.909(s)                                         | 141.77                    |
| 92 | Hypoxanthine              | 8.22(s),8.20(s)                                  | 145.2, 147.5              |
| 93 | Oxypurinol                | 8.209(s)                                         | 129.09                    |
| 94 | Formate                   | 8.467(s)                                         | 172.4                     |

Note: a indicates the displacement value of  $^1\text{H}/^{13}\text{C}$  is based on the HSQC spectra. “—” indicates the corresponding displacement value of  $^{13}\text{C}$  is not found in the HSQC spectra, and the attribution of metabolite is a reference only the  $^1\text{H}$  displacement in NOESY spectra.

**Supplementary Table S2** NMR data for metabolites detected in feces extracts

| Key | Metabolites                             | $\delta^1\text{H}$ (ppm)                                   | $\delta^{13}\text{C}$ (ppm <sup>a</sup> ) |
|-----|-----------------------------------------|------------------------------------------------------------|-------------------------------------------|
| 1   | $\alpha$ -Keto- $\beta$ -methylvalerate | 0.887(t), 1.104(d), 1.47(m),1.687(m), 2.923(m)             | 12.9, 16.5, 27.4, 27.4, 42.2              |
| 2   | Caproate                                | 0.887(t), 1.292(m),1.309(m), 1.556(m), 2.178(t)            | 16.23, 32.69, 23.66, 29.05, 39.54         |
| 3   | Butyrate                                | 0.899(t), 1.562(m), 2.150(t)                               | 16.0, 22.1, 42.3                          |
| 4   | 3-Methyl-2-oxovalerate                  | 0.899(t), 1.093(d), 1.438(m), 1.662(m), 2.928(m)           | 13.2, 16.4, 26.8, 26.8, 45.9              |
| 5   | Valerate                                | 0.899(t), 1.309(m), 2.178(d)                               | 16.39, 23.94, 39.56                       |
| 6   | $\alpha$ -Ketoisocaproate               | 0.920(s), 2.054(m), 2.616(d)                               | 25.0, 26.3, 46, 181.6                     |
| 7   | Leucine                                 | 0.925(d), 0.936(s), 1.703(m), 3.725(d)                     | 23.39, 24.3, 26.62, 56.88                 |
| 8   | Isoleucine                              | 0.936(t), 0.995(d), 1.249(m), 1.452(m), 1.971(m), 3.655(d) | 14.7, 17.2, 26.8, 26.8, 62.4              |
| 9   | Valine                                  | 0.979(d), 1.013(d), 2.275(m), 3.617(d)                     | 19.6, 20.5, 32.2, 63.4                    |
| 10  | Propionate                              | 1.061(t), 2.191(q)                                         | 12.95, 33.35                              |
| 11  | Methylsuccinate                         | 1.104(d), 2.134(d), 2.633(m)                               | 20.68, 44.43, —                           |
| 12  | $\alpha$ -Ketoisovalerate               | 1.127(d), 3.022(m)                                         | 18.8, 39.5                                |
| 13  | <i>n</i> -Heptanoate                    | 1.309(m)                                                   | 30.22                                     |
| 14  | Threonine                               | 1.330(d), 3.579(d), 4.269(m)                               | 23.5, 63.2, 68.2                          |
| 15  | Lactate                                 | 1.331(d),4.115(q)                                          | 22.89, 71.40                              |
| 16  | Lysine                                  | 1.415(m), 1.719(m), 1.869(m), 3.018(t), 3.741(t)           | 23.44, 29.72, —, 41.5, 57.58              |
| 17  | Cadaverine                              | 1.483(d), 1.724(m), 3.022(t)                               | 25.96, 29.37, 41.41                       |
| 18  | Alanine                                 | 1.489(d), 3.780(q)                                         | 18.26, 53.32                              |
| 19  | 5-Aminovalerate                         | 1.624(t), 1.650(t), 2.237(m), 3.022(m)                     | 25.58, 29.76, 39.35, 41.37                |
| 20  | Acetate                                 | 1.927(s)                                                   | 26.54                                     |
| 21  | Proline                                 | 2.023(m), 2.334(m), 3.320(m), 3.392(m), 4.147(t)           | 25.78, 32.11, 48.71, 48.71, 63.51         |
| 22  | Glutamate                               | 2.056(m), 2.334(m), 3.741 (m,m,q)                          | 30.1, 36.4, 57.6                          |
| 23  | Glutamine                               | 2.138(m), 2.445(m), 3.768(t)                               | 29.53, 32.96, 57.10                       |
| 24  | Methionine                              | 2.141(s), 2.169(m), 2.648(t), 3.853(m)                     | 16.0, 31, 56.7                            |

|    |                     |                                                                      |                                       |
|----|---------------------|----------------------------------------------------------------------|---------------------------------------|
| 25 | Pyruvate            | 2.373(s)                                                             | 29.5                                  |
| 26 | Succinate           | 2.413(s)                                                             | 37.3                                  |
| 27 | Desaminotyrosine    | 2.463(t), 2.835(t), 6.859(d), 7.191(d)                               | 42.87, 33.72, 118.54, 132.6           |
| 28 | 3-Phenylpropionate  | 2.496(t), 2.883(d), 7.274(t), 7.325(d), 7.375(m)                     | —, 34.44, —, —, 131.18                |
| 29 | Aspartate           | 2.666(dd), 2.805(dd), 3.898(dd)                                      | 39.3, 39.3, 55.1                      |
| 30 | Sarcosine           | 2.704(s), 3.597(s)                                                   | 34.86, 53.7                           |
| 31 | Dimethylamine       | 2.719(s)                                                             | 36.8                                  |
| 32 | Asparagine          | 2.862(dd), 2.962(m), 3.995(dd)                                       | 37.6, 37.6, 54.3                      |
| 33 | Trimethylamine      | 2.871(s)                                                             | 47.4                                  |
| 34 | Creatine            | 3.028(s), 3.926(s)                                                   | 40.15, 56.25                          |
| 35 | Tyrosine            | 3.068(d), 3.140(dd), 3.943(d), 6.906(dd), 7.197(d)                   | 37.91, 37.87, 59.39, 118.8, 133.39    |
| 36 | Malonate            | 3.112(s)                                                             | 50.13                                 |
| 37 | Phenylalanine       | 3.117(dd), 3.270(dd), 4.001(q), 7.323(d), 7.365(t), 7.42(m)          | 38.9, 38.9, 58.9, 132.2, 129.8, 131.9 |
| 38 | Ethanolamine        | 3.134(d), 3.817(d)                                                   | 45.38, 60.22                          |
| 39 | Histidine           | 3.144(dd), 3.249(dd), 4.001(q), 7.093(s), 7.844(s)                   | —, —, —, 119, 139.1                   |
| 40 | Choline             | 3.191(s), 3.504(t), 4.085(m)                                         | 56.9, 70.1, 58.2                      |
| 41 | $\beta$ -Glucose    | 3.243(t), 3.478(m), 3.492(m), 3.864(m), 3.927(s), 4.660(d)           | —, —, —, 63.26, 63.26, 98.39          |
| 42 | Taurine             | 3.243(t), 3.435(t)                                                   | 49.5, 37.5                            |
| 43 | Betaine             | 3.27(s), 3.91(s)                                                     | 57.0, 68.0                            |
| 44 | Nethanol            | 3.366(s)                                                             | 51.17                                 |
| 45 | $\alpha$ -Glucose   | 3.417(m), 3.546(m), 3.726(m), 3.742(m), 3.772(m), 3.869(m), 5.210(d) | 72.4, 74.3, 75.4, —, —, 75.2, 94.9    |
| 46 | $\beta$ -Arabinose  | 3.525(dd), 3.671(t), 3.856(dd), 3.945(m), 4.523(d)                   | —, 69.8, 70.6, —, 99.7                |
| 47 | Phenylacetate       | 3.542(s), 7.317(m), 7.375(m)                                         | 47.21, 129.57, 131.08                 |
| 48 | Glycine             | 3.566(s)                                                             | 44.5                                  |
| 49 | Serine              | 3.828(dd), 3.949(dd), 3.981(dd)                                      | 59.32, —, —                           |
| 50 | $\alpha$ -arabinose | 3.850(d), 3.906(m), 3.993(t), 4.023(d), 5.251(d)                     | —, —, 72.3, 66.37, 93.94              |
| 51 | Uracil              | 5.805(d), 7.540(d)                                                   | 104.2, 146.2                          |
| 52 | Fumarate            | 6.524(s)                                                             | 137.5                                 |
| 53 | Urocanate           | 6.40(d), 7.318(d), 7.434(s), 7.885(s)                                | 133.42, 124.74, 141.43, 134.16        |
| 54 | Imidazole           | 7.327(s), 8.297(s)                                                   | 123.24, 133.94                        |
| 55 | Adenine             | 8.195(s), 8.213(s)                                                   | 144.2, 156.2                          |

Note: Note: a indicates the displacement value of  $^1\text{H}/^{13}\text{C}$  is based on the HSQC spectra. “—” indicates the corresponding displacement value of  $^{13}\text{C}$  is not found in the HSQC spectra, and the attribution of metabolite is a reference only the  $^1\text{H}$  displacement in NOESY spectra.

### Supplementary Figure S1

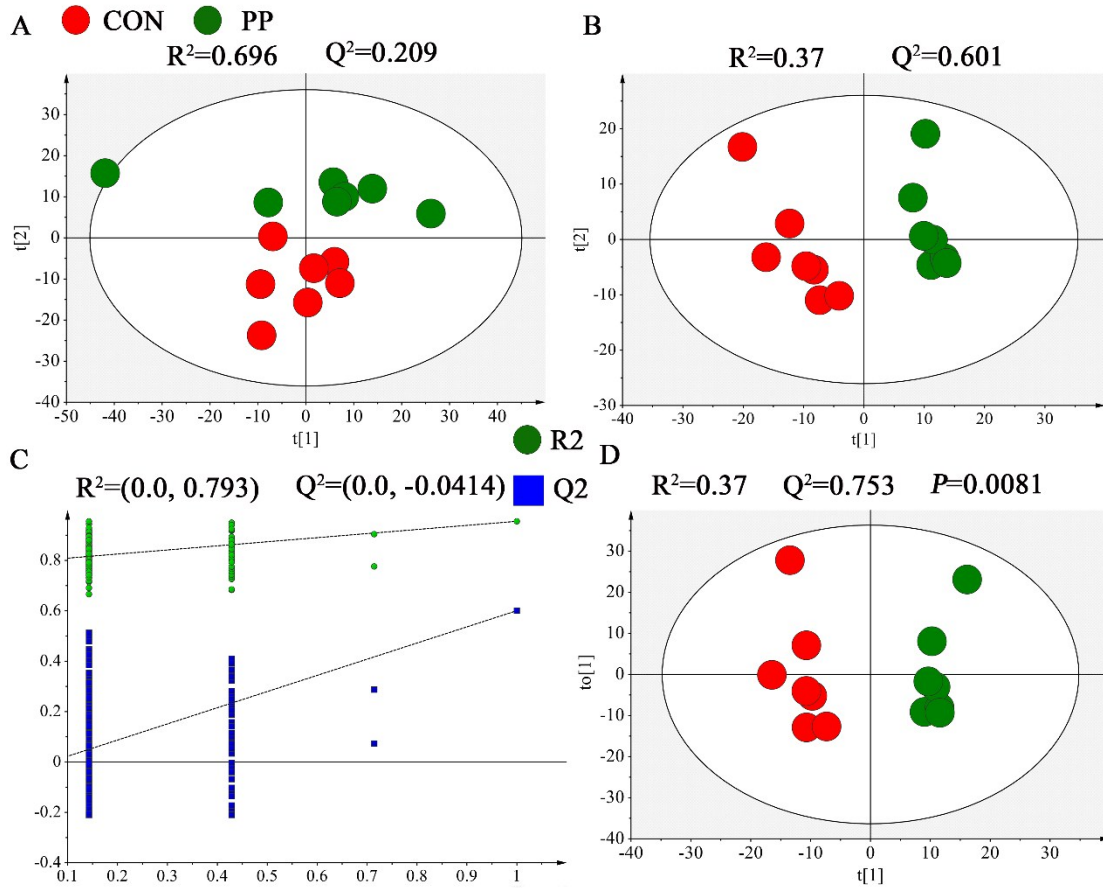

**Fig. S1**  $^1\text{H-NMR}$ -based metabolomic analysis of urine samples. PCA (A) and PLS-DA (B) score plots derived from the  $^1\text{H-NMR}$  spectra of urine extracts obtained from CON and PP groups, and cross validation (C) by permutation test at day 14. OPLS-DA (D) score plot derived from the  $^1\text{H-NMR}$  spectra of urine extracts showing the discrimination between CON and PP groups at day 14.

**Supplementary Figure S2**

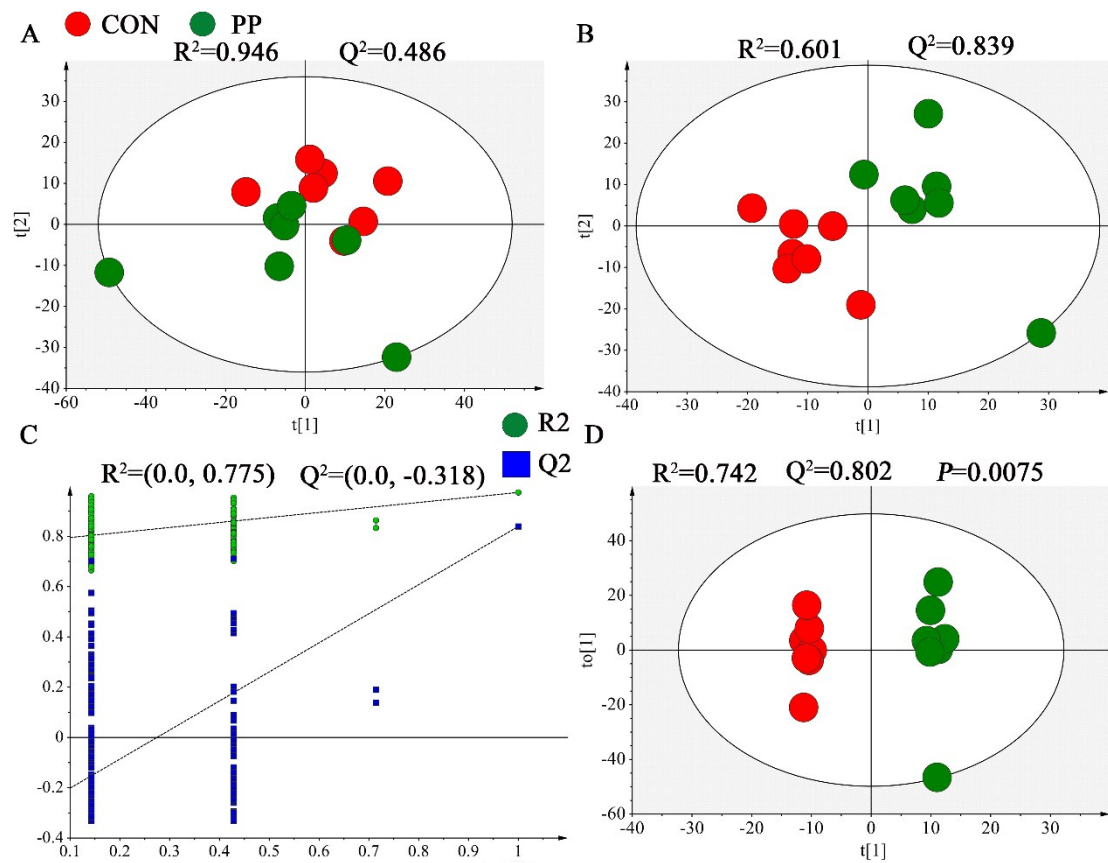

**Fig. S2**  $^1\text{H-NMR}$ -based metabonomic analysis of feces samples. PCA (A) and PLS-DA (B) score plots derived from the  $^1\text{H-NMR}$  spectra of feces extracts obtained from CON and PP groups, and cross validation (C) by permutation test at day 14. OPLS-DA (D) score plot derived from the  $^1\text{H-NMR}$  spectra of feces extracts showing the discrimination between CON and PP groups at day 14.
